# Supplementary material for: Effect of Fusarium-Derived Metabolites on the Barrier Integrity of Differentiated Intestinal Porcine Epithelial Cells (IPEC-J2)
Source: PubMed Central journal article supplement (PMC5127141; doi:10.3390/toxins8110345), 2016-11-19
Supplement: toxins-08-00345-s001.pdf [file toxins-08-00345-s001.pdf]

## Supplementary Materials: Effect of *Fusarium*-Derived Metabolites on the Barrier Integrity of Differentiated Intestinal Porcine Epithelial Cells (IPEC-J2)

Alexandra Springler, Galina-Jacqueline Vrubel, Elisabeth Mayer, Gerd Schatzmayr and Barbara Novak

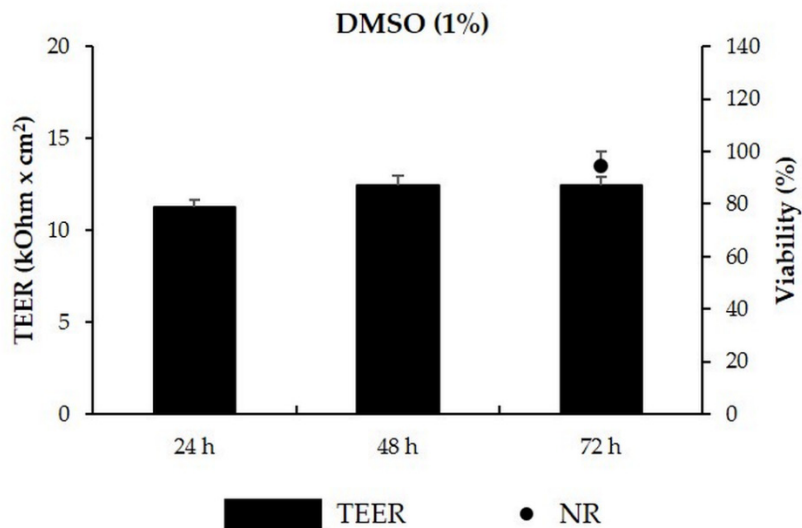

**Figure S1.** Effect of DMSO (1%) on TEER and viability of differentiated IPEC-J2. Differentiated IPEC-J2 were treated with DMSO (1%). TEER was measured after 24, 48 and 72 h. After the final TEER measurement, viability was determined via the NR assay. Data represent mean  $\pm$  SD,  $n = 3$ .
